# Supplementary material
Source: PubMed Central journal article supplement (PMC3767768)

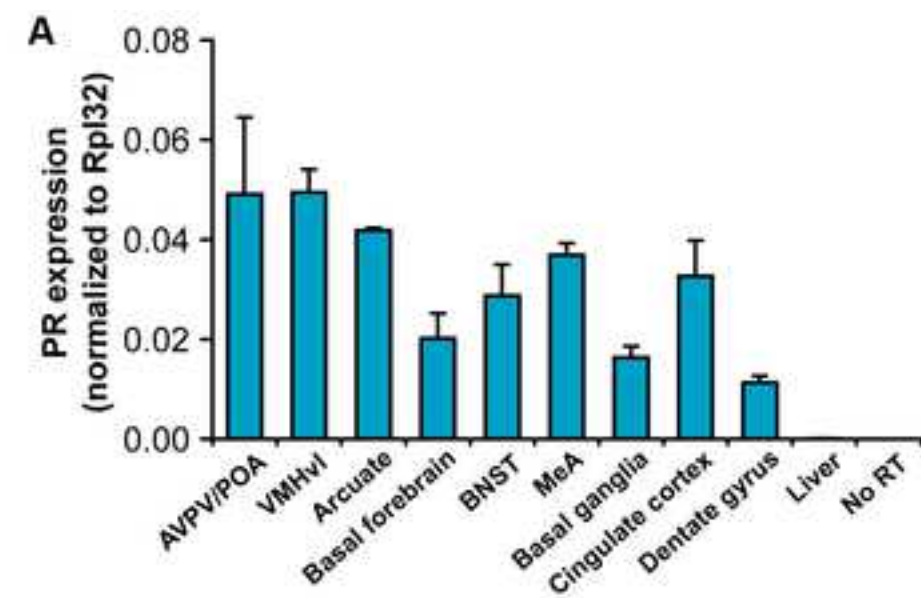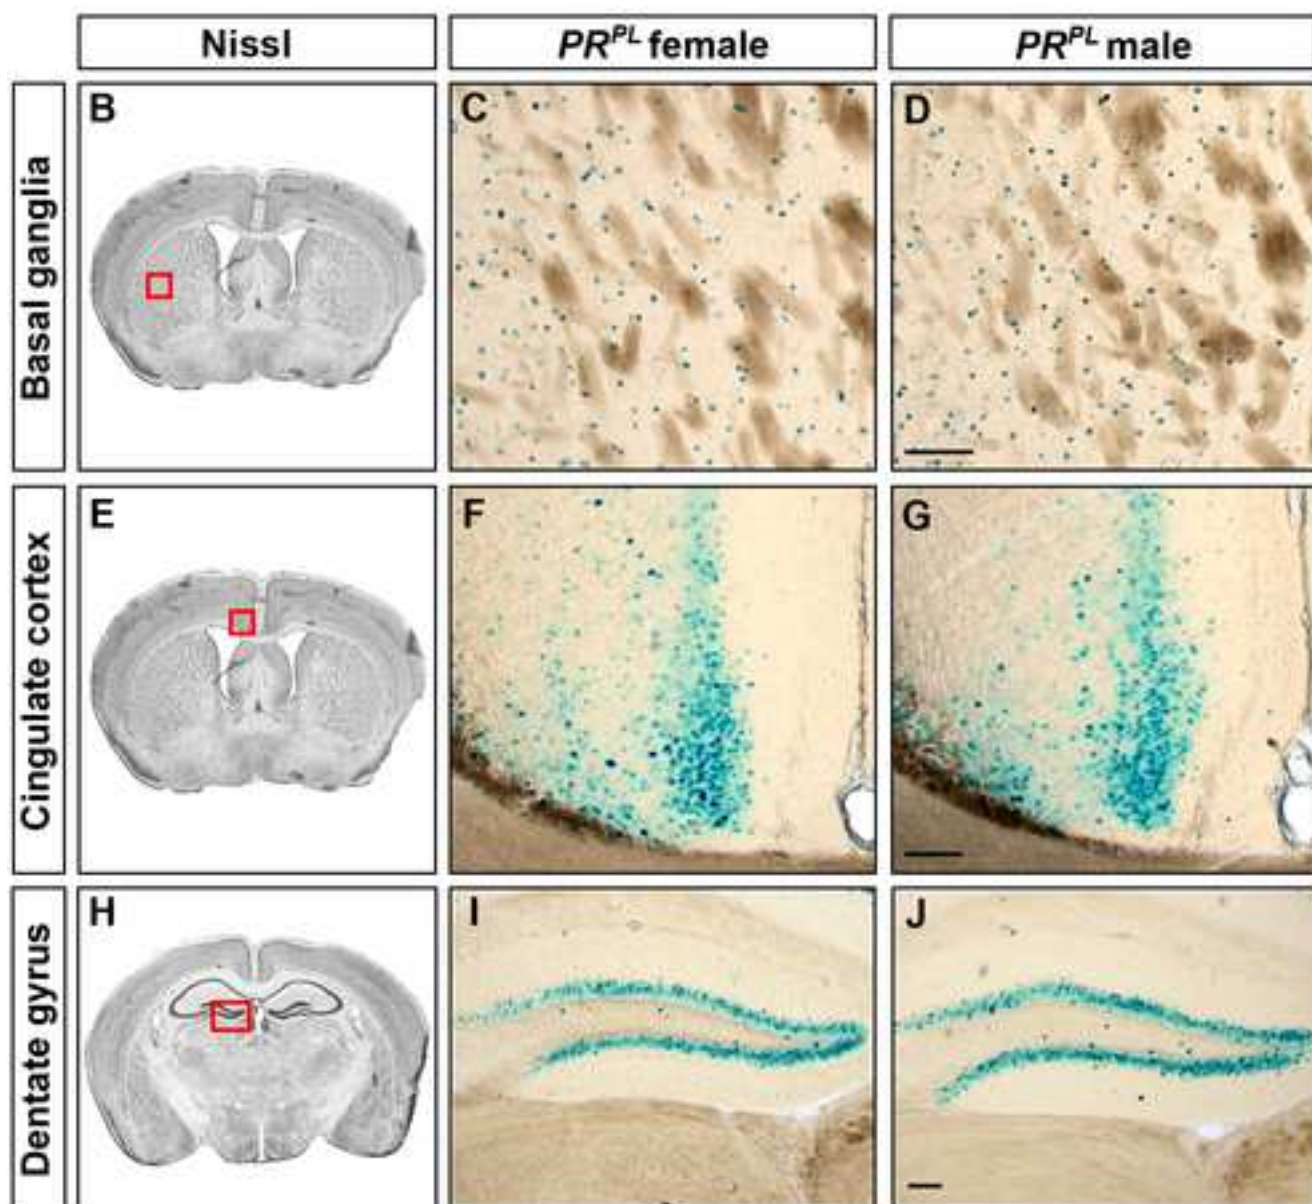

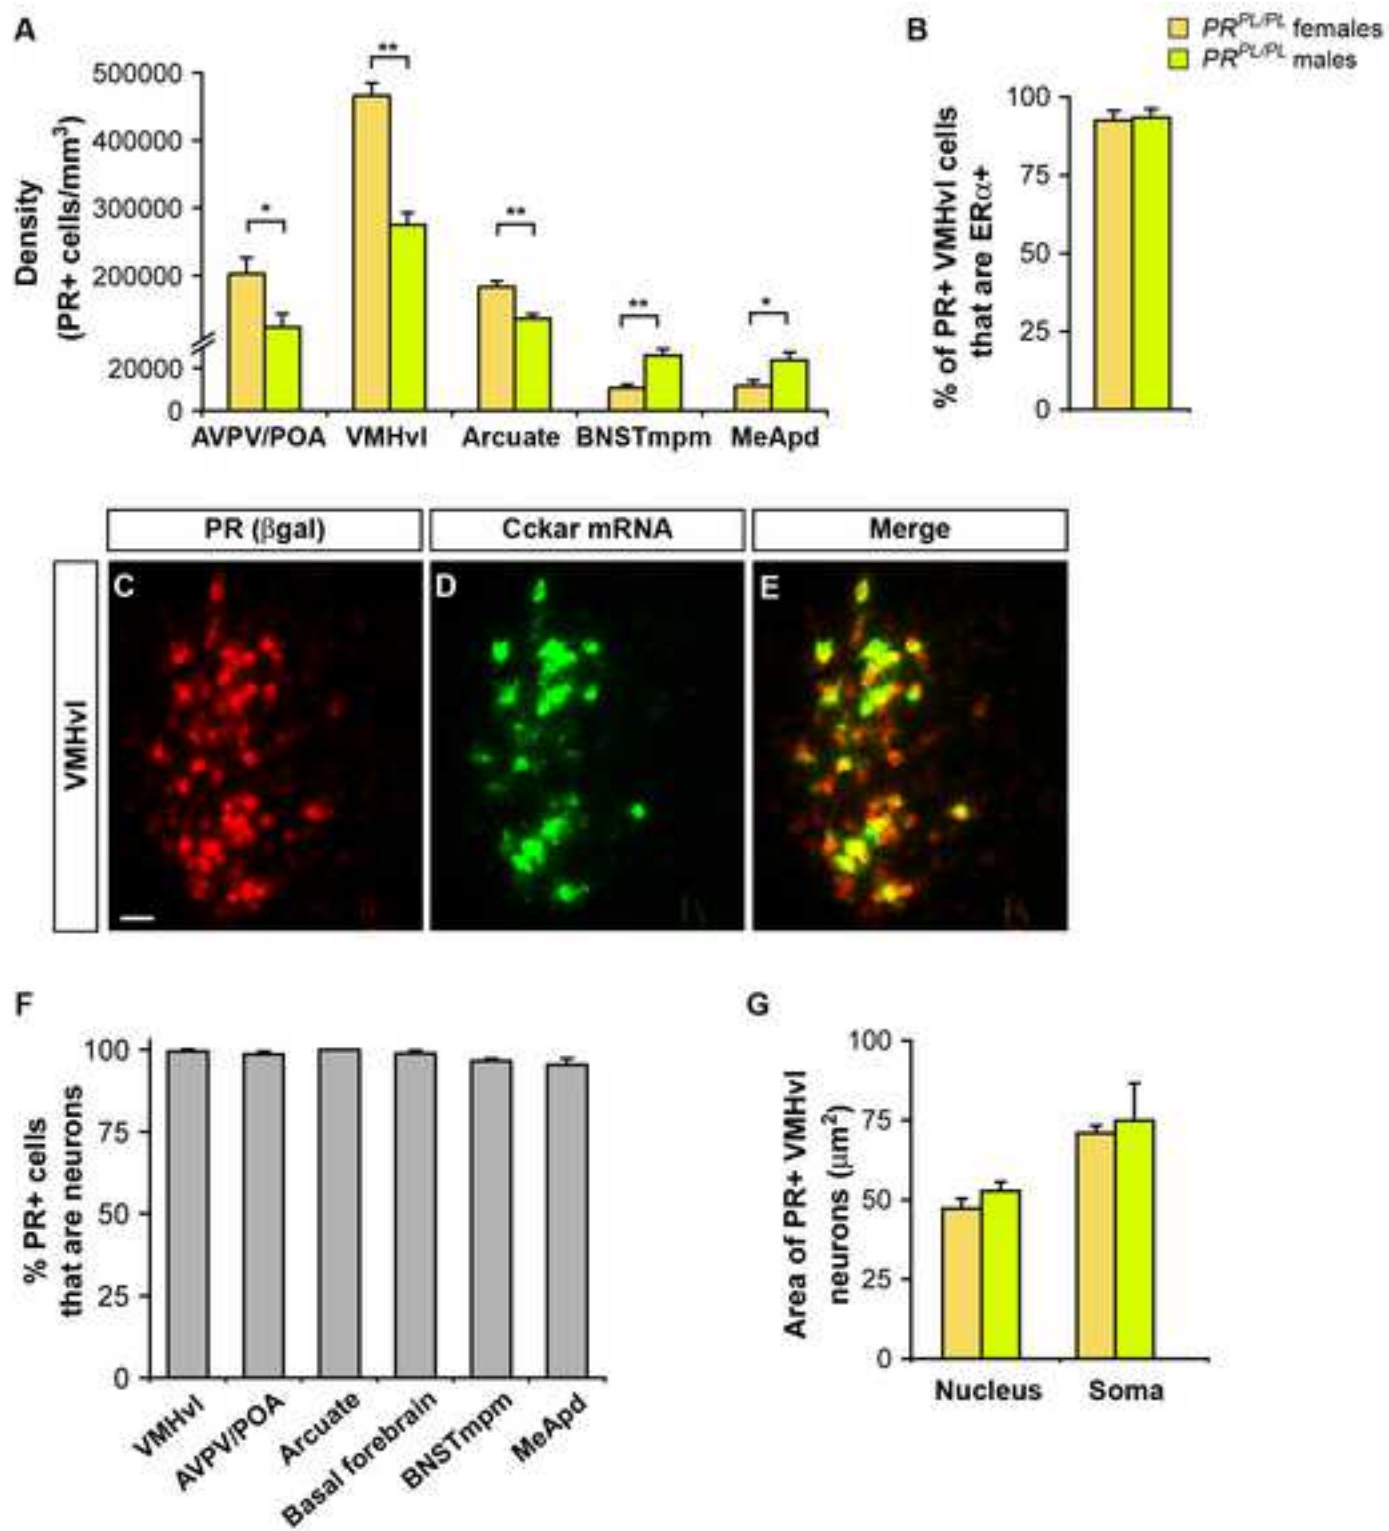

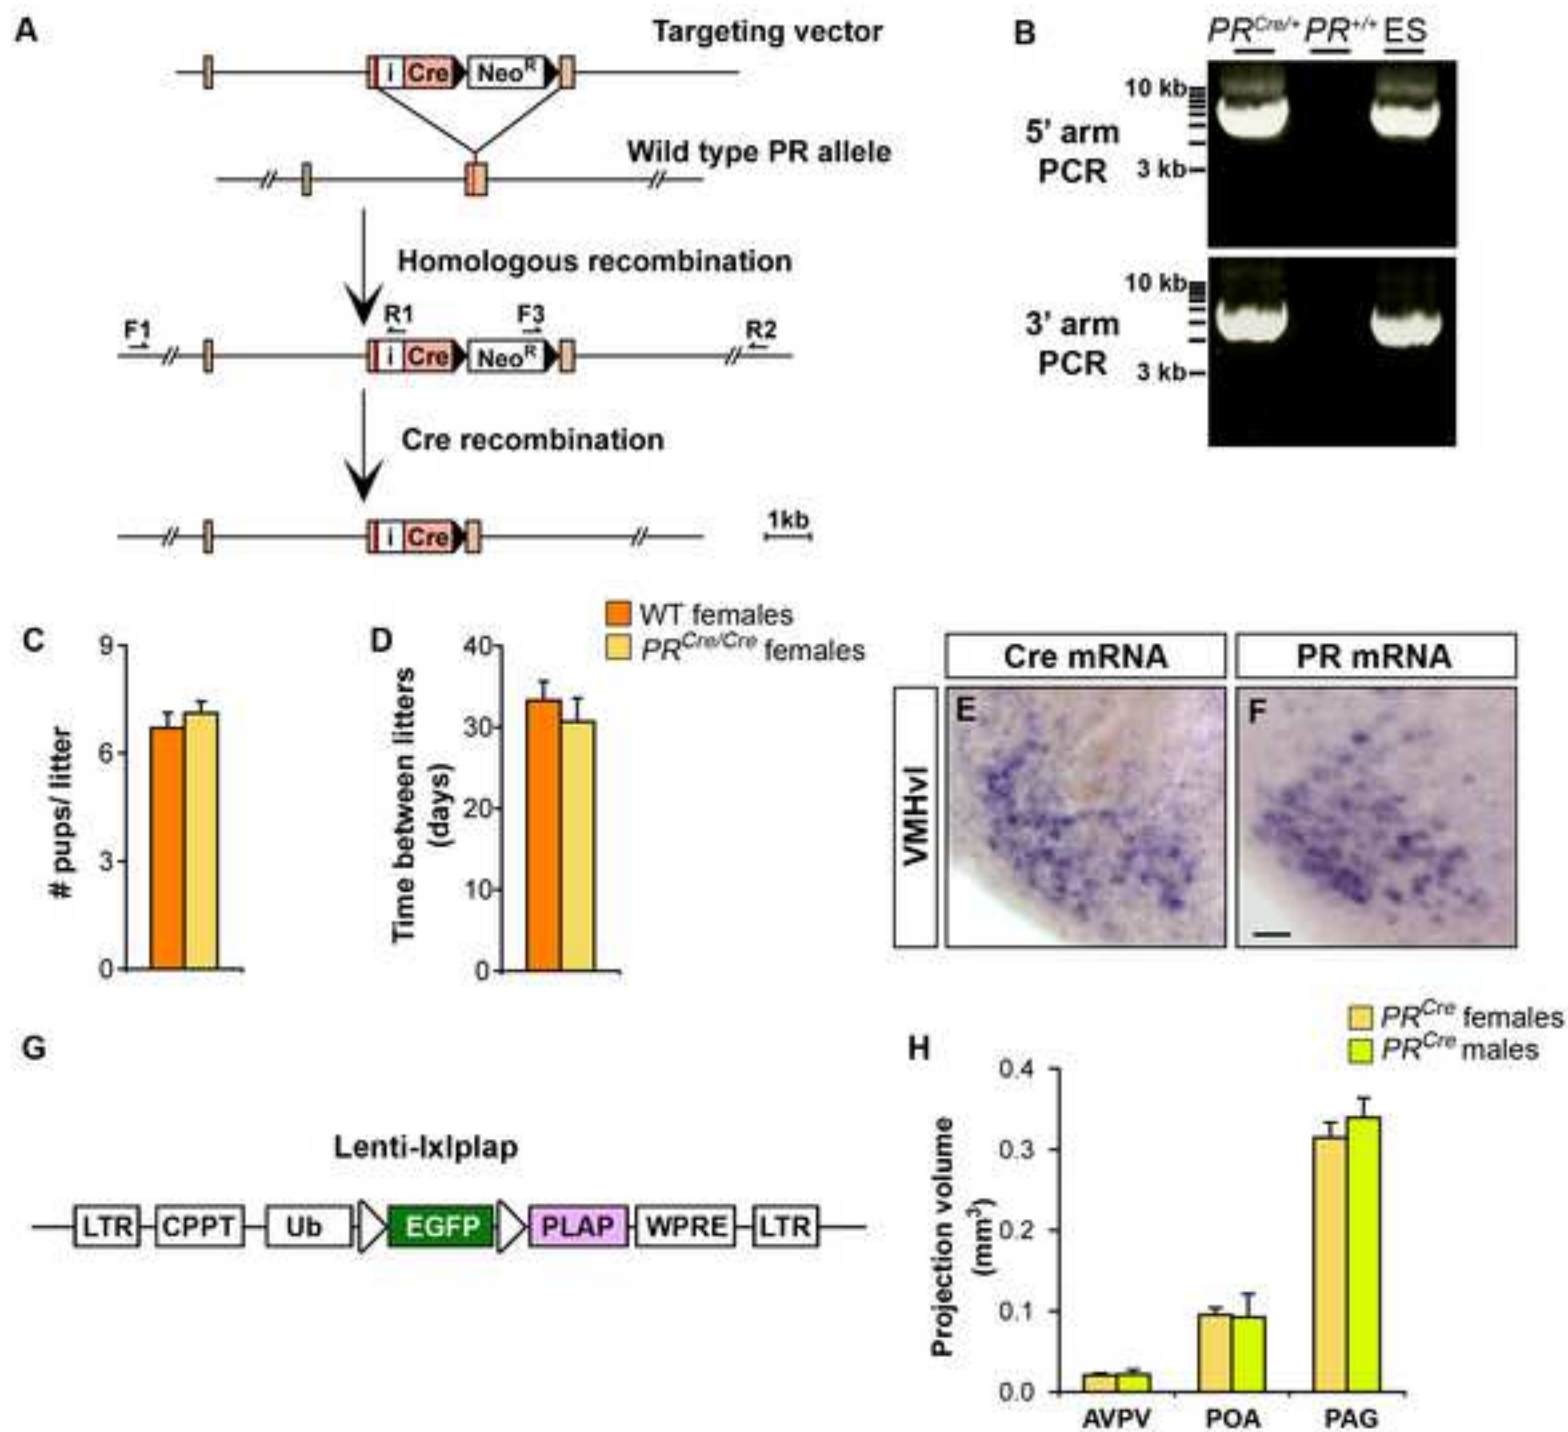

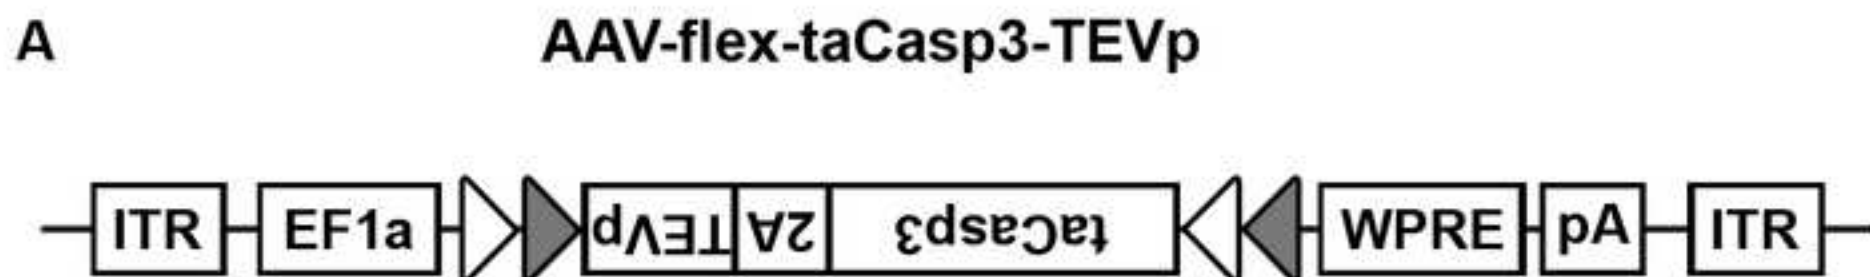

**B** **AAV-taCasp3-TEVp injected**

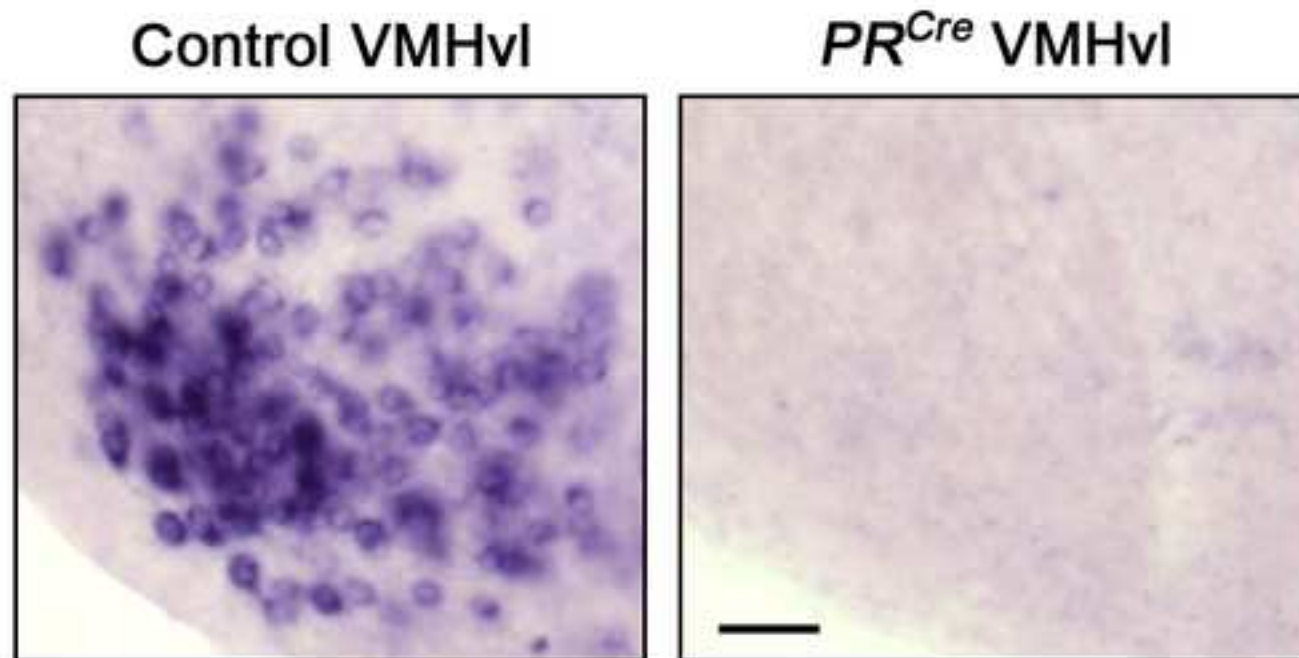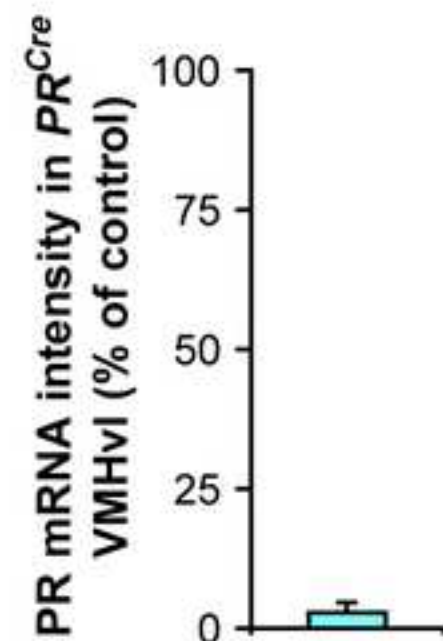



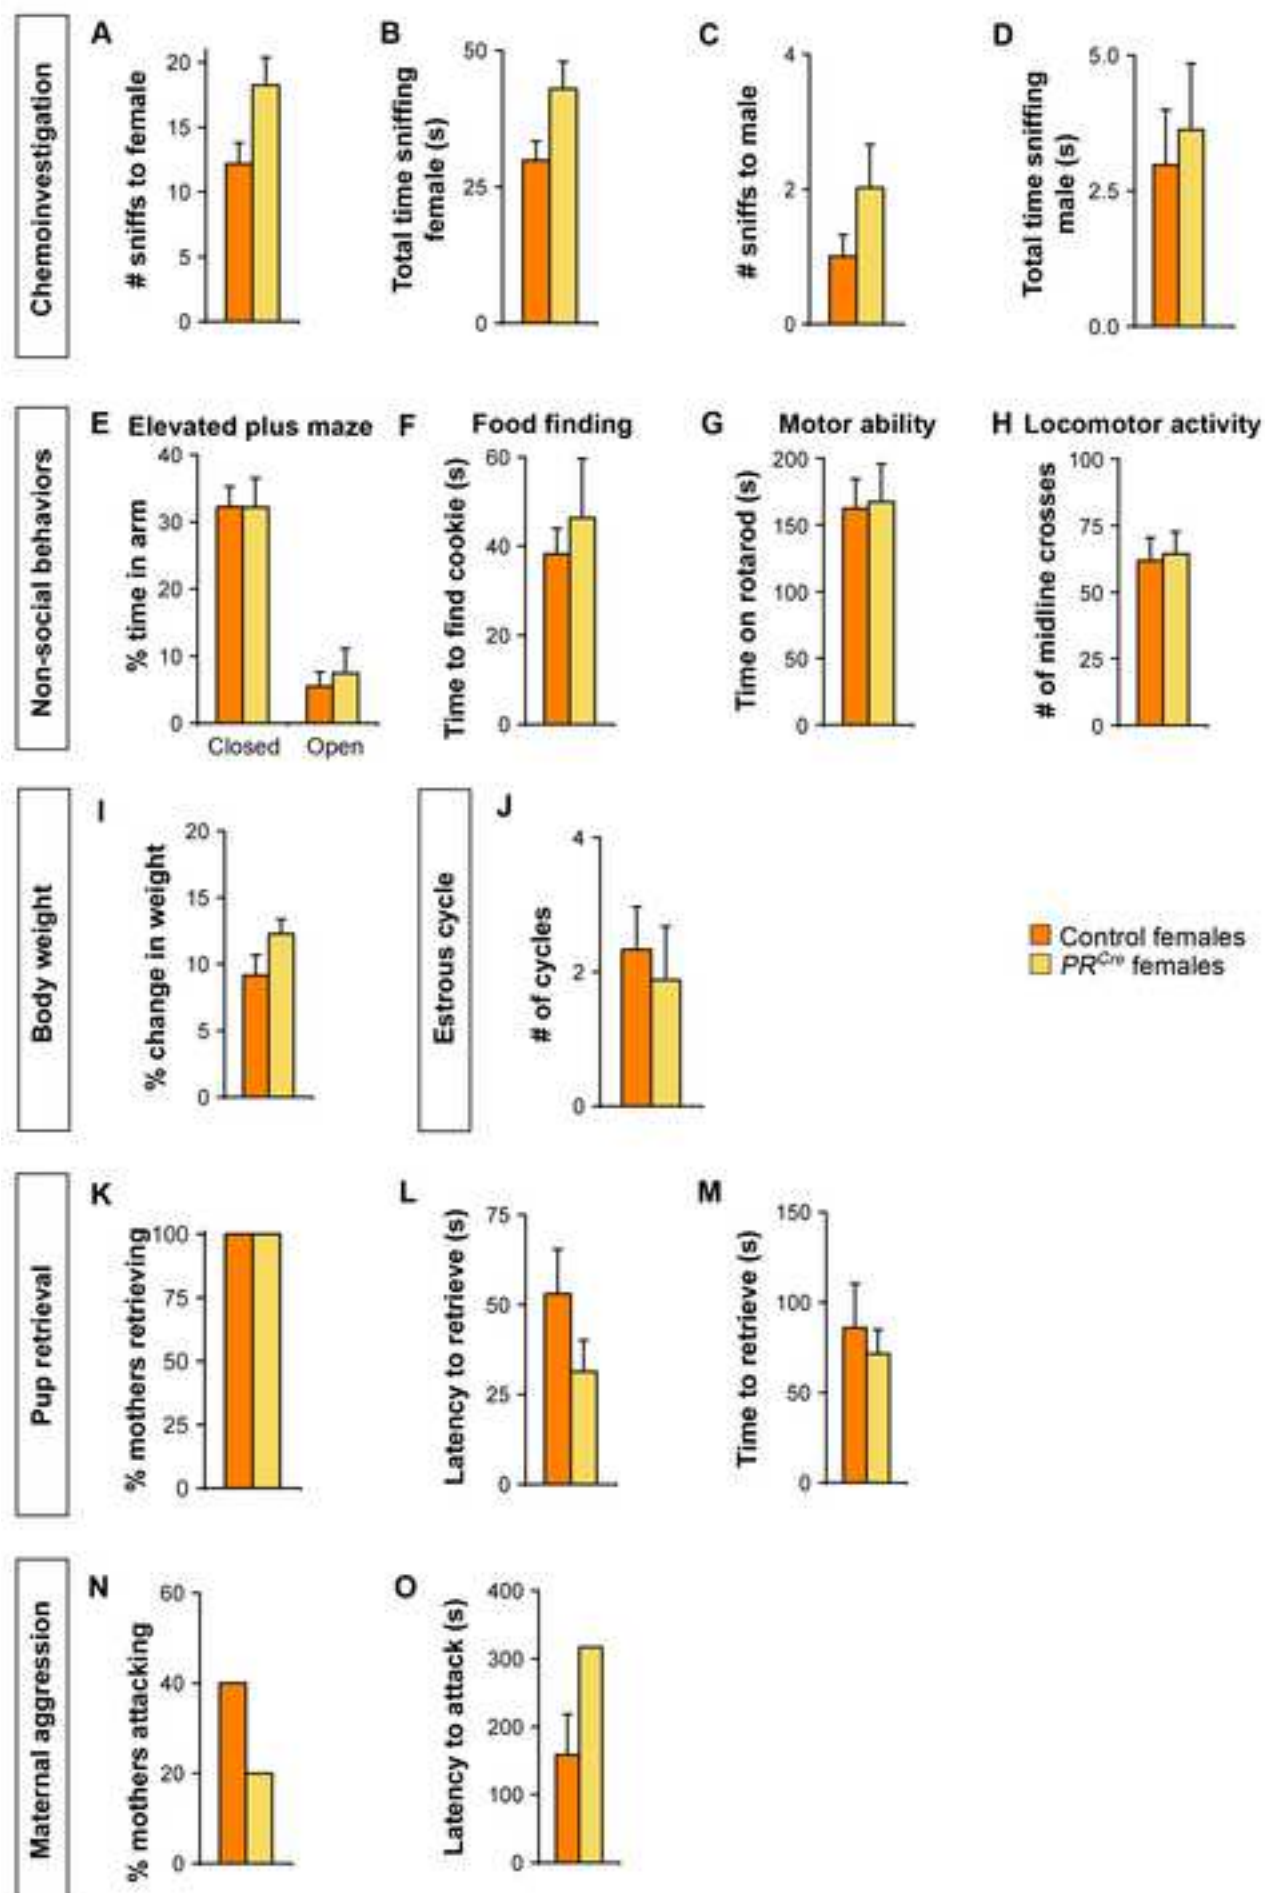

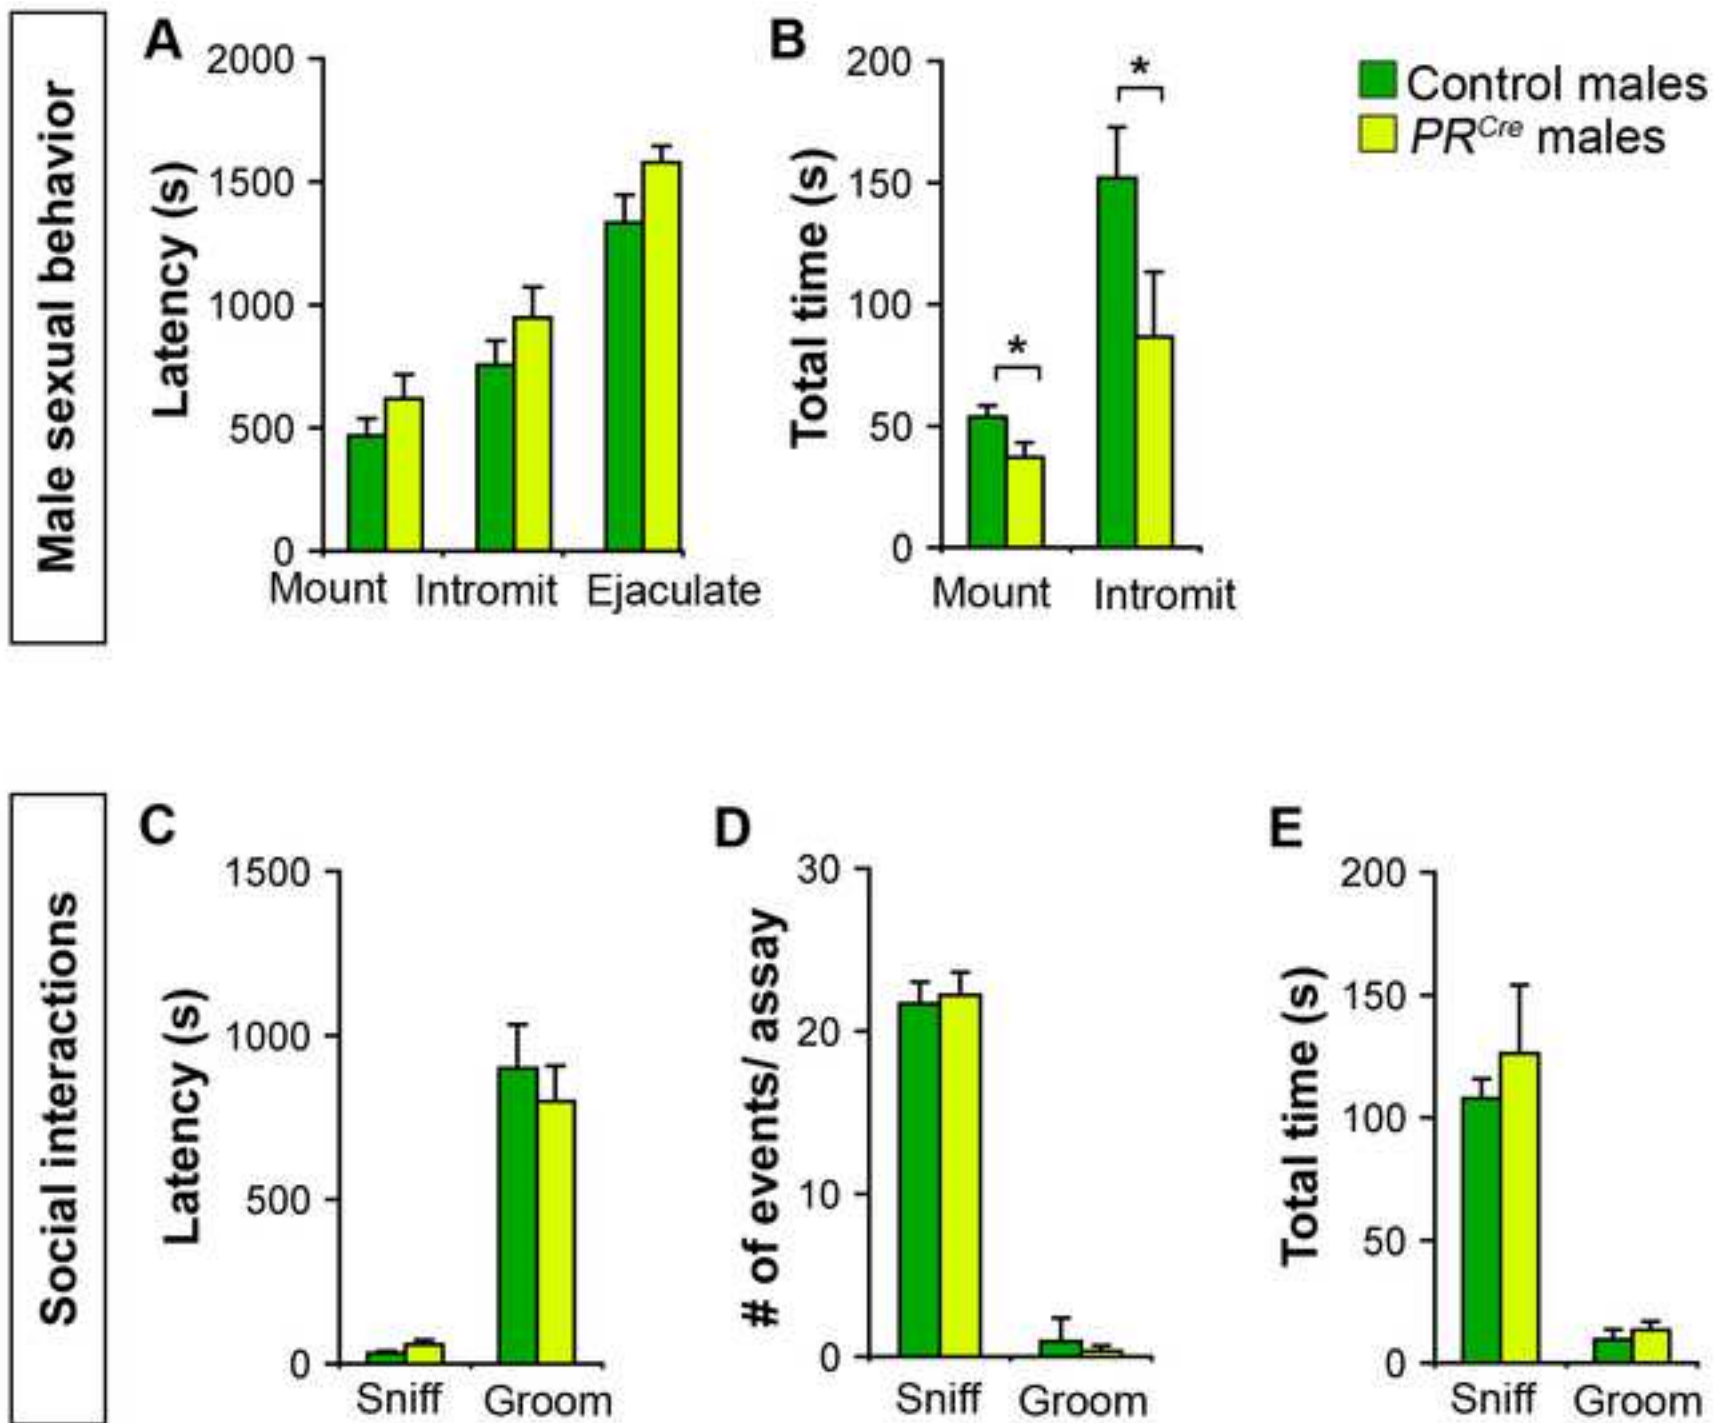

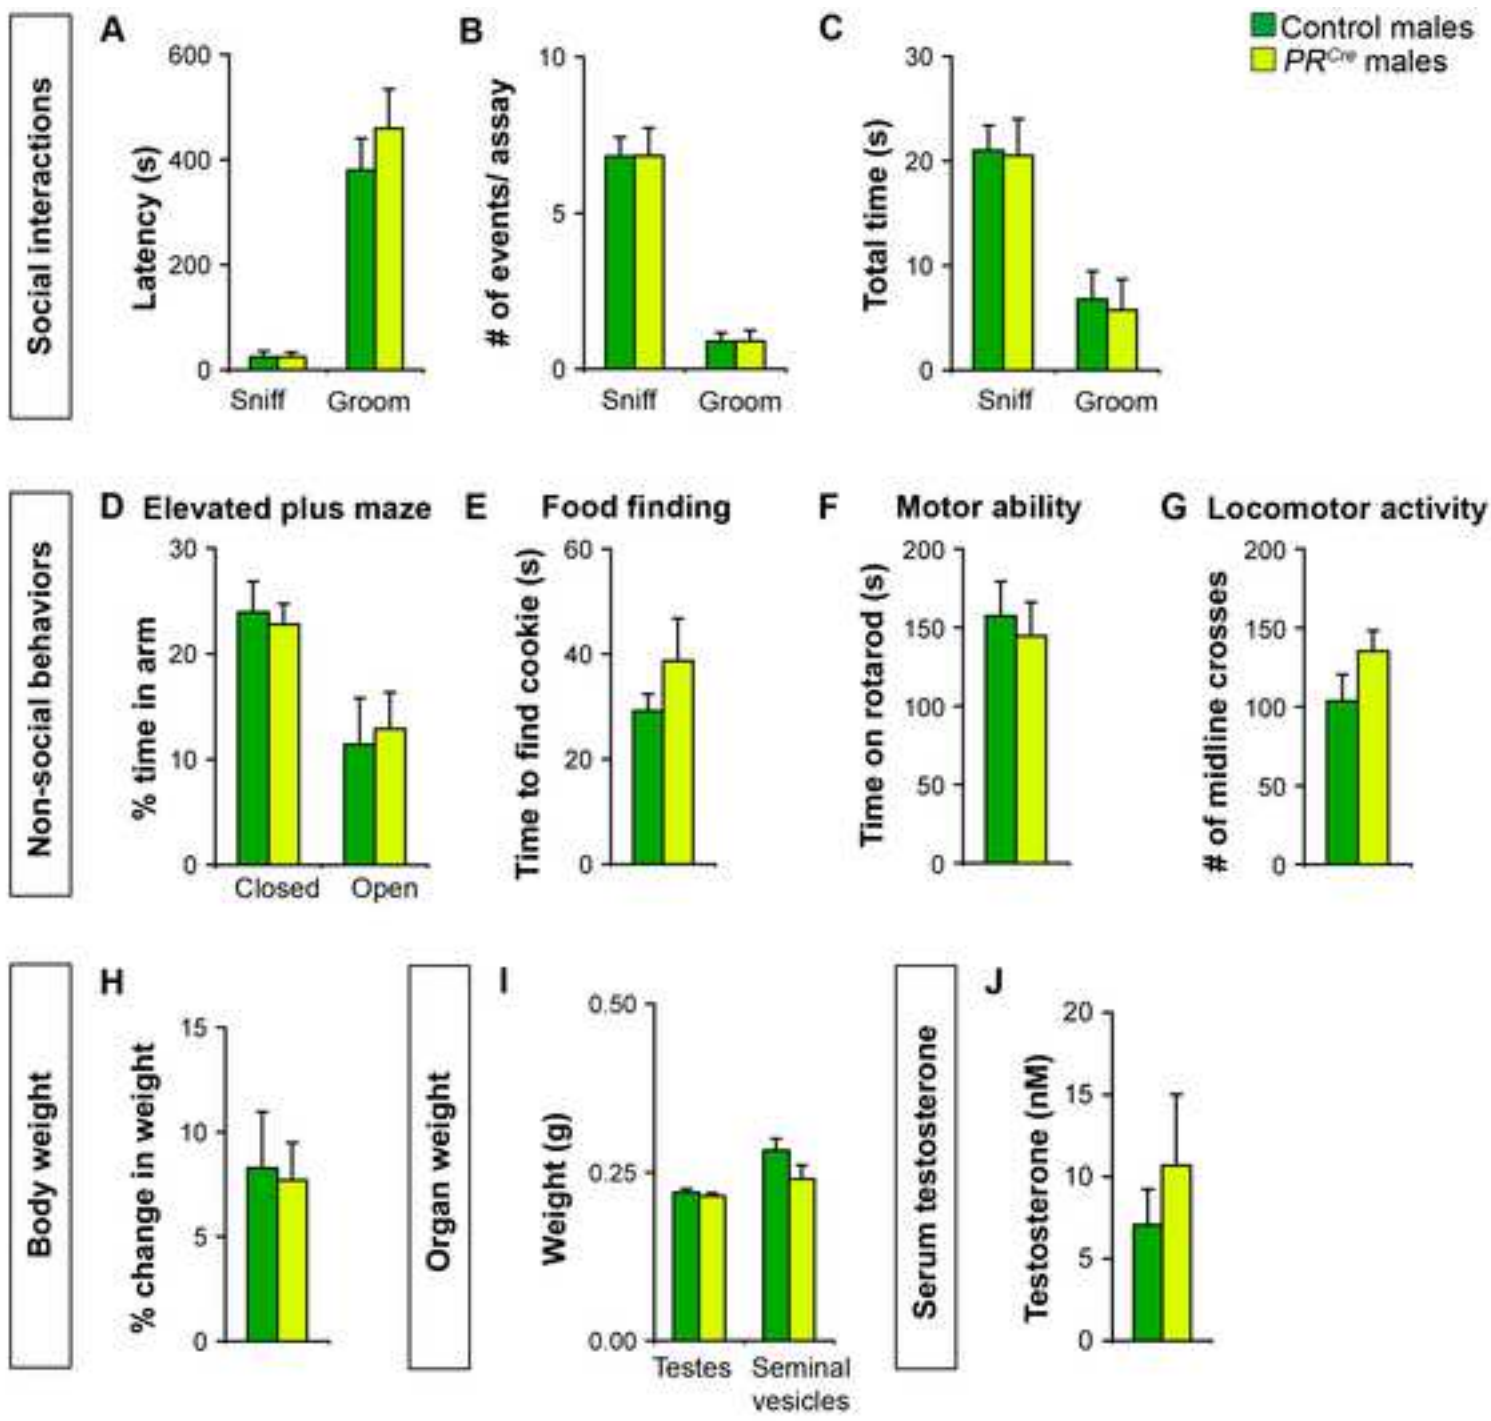

Supplement: NIHMS487842-supplement-04.pdf [file NIHMS487842-supplement-04.pdf]
